# Supplementary figures and images for: Role of Tuber Developmental Processes in Response of Potato to High Temperature and Elevated CO2
Source: MDPI journal article supplement (doi:10.3390/plants10050871), 2021-04-26

**a**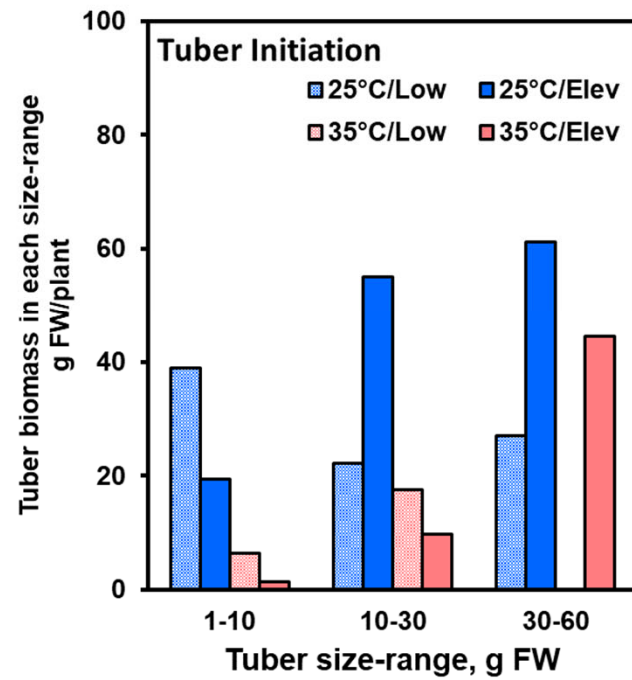**b**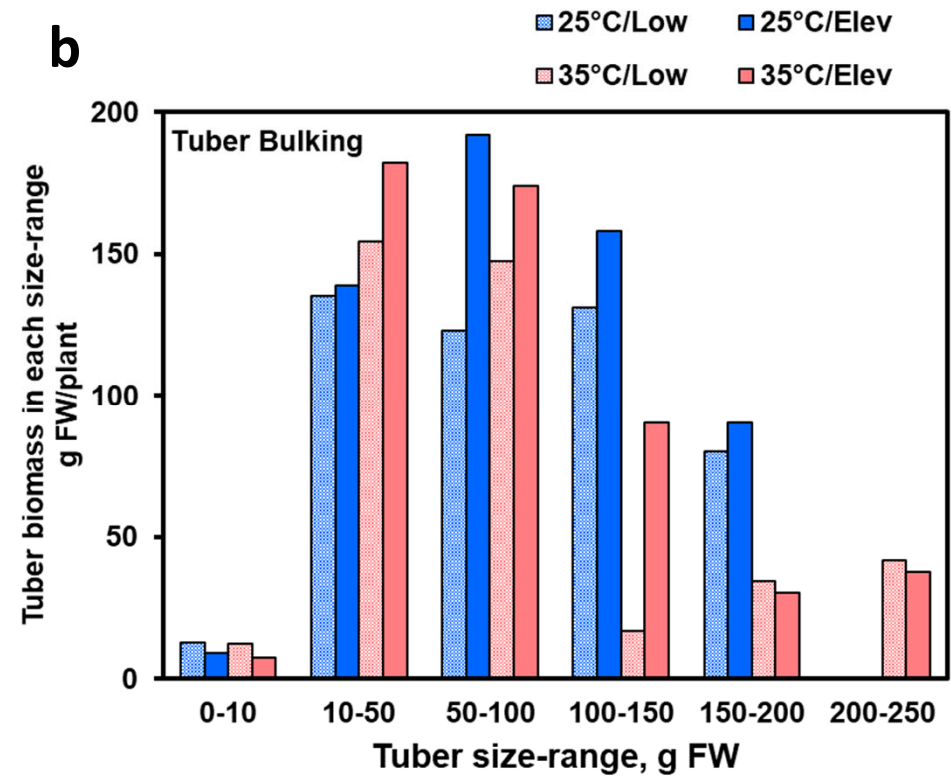

Suppl. Figure S1

Supplement: s1 [file s1]
